# Supplementary material for: RRG: redundancy reduced gossip protocol for real-time N-to-N dynamic group communication
Source: Springer Nature journal article supplement (doi:10.1186/1869-0238-4-14), 2013-01-01
Supplement: 13174_2012_12_MOESM1_ESM.pdf [file 13174_2012_12_MOESM1_ESM.pdf]

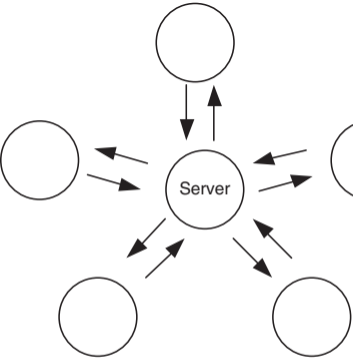

(a) Centralized approach, which uses a centralized server for forwarding and mixing of multimedia streams

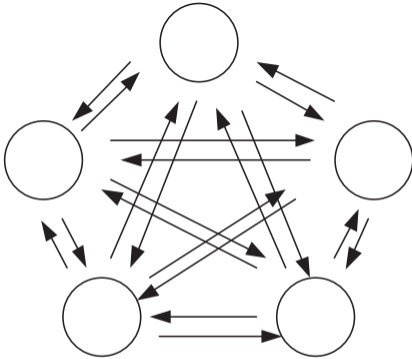

(b) Fully connected overlay approach, where all peers are in direct contact with one another

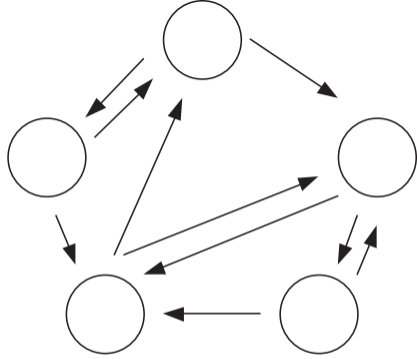

(c) Gossip-based approach, where peers operate in parallel, and each peer communicates with one or more randomly selected partner
