# Supplementary material for: RRG: redundancy reduced gossip protocol for real-time N-to-N dynamic group communication
Source: Springer Nature journal article supplement (doi:10.1186/1869-0238-4-14), 2013-01-01
Supplement: 13174_2012_12_MOESM4_ESM.pdf [file 13174_2012_12_MOESM4_ESM.pdf]

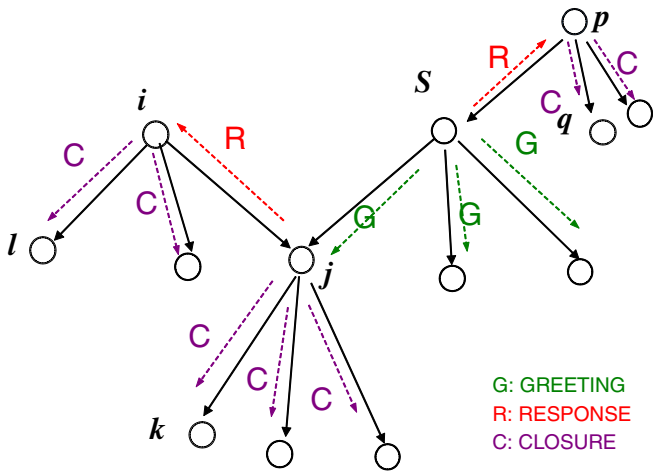

G: GREETING  
 R: RESPONSE  
 C: CLOSURE

- $j$ : a child of  $s$ ,
- $k$ : a child of  $j$  and thus a grandchild of  $s$ ,
- $i$ : another parent of  $j$  and thus a co-parent with  $s$ ,
- $l$ : a child of  $i$  and thus a step-child of  $s$ ,
- $p$ : a parent of  $s$ ,
- $q$ : a child of  $p$  and thus a sibling of  $s$ .
