# Supplementary material for: RRG: redundancy reduced gossip protocol for real-time N-to-N dynamic group communication
Source: Springer Nature journal article supplement (doi:10.1186/1869-0238-4-14), 2013-01-01

Peer #1

Peer #2

Peer #3

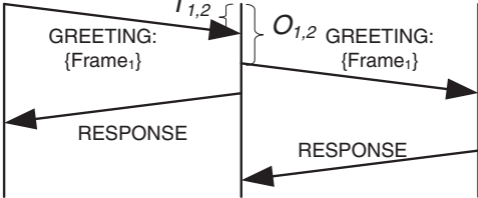

Supplement: 13174_2012_12_MOESM7_ESM.pdf [file 13174_2012_12_MOESM7_ESM.pdf]
