# Supplementary material for: RRG: redundancy reduced gossip protocol for real-time N-to-N dynamic group communication
Source: Springer Nature journal article supplement (doi:10.1186/1869-0238-4-14), 2013-01-01

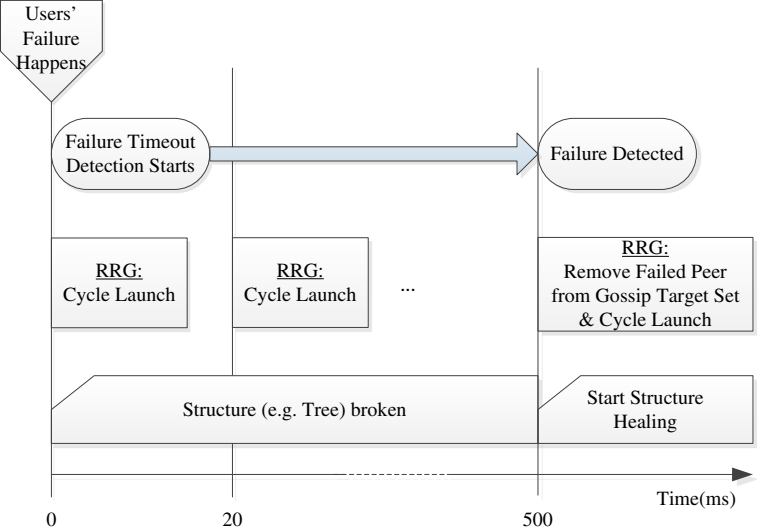

Supplement: 13174_2012_12_MOESM10_ESM.pdf [file 13174_2012_12_MOESM10_ESM.pdf]
